# Supplementary material for: Interrogating the thionium hydrogen bond as a noncovalent stereocontrolling interaction in chiral phosphate catalysis
Source: Royal Society of Chemistry journal article supplement (doi:10.1039/d2sc02171d), 2022-01-01
Supplement: d2sc02171d2.xlsx [file d2sc02171d2.xlsx]

## Sheet: parameters
Aromatic group thionium	N-substituent nucleophile	NBO(S)	B1(L)	Polarizability	NBO(Nu)	LNu	B5C5	LC6	nPOas
Ph	1-naphth-SO2-	0.248	1.7	121.46	-0.868	5.02	1.09	4.67	1388.72
4-MeC6H4	1-naphth-SO2-	0.246	1.89	141.83	-0.868	5.02	1.09	4.67	1388.72
4-tBuC6H4	1-naphth-SO2-	0.245	2.93	182.97	-0.868	5.02	1.09	4.67	1388.72
4-SMeC6H4	1-naphth-SO2-	0.242	1.8	187.59	-0.868	5.02	1.09	4.67	1388.72
4-ClC6H4	1-naphth-SO2-	0.248	1.74	146.7	-0.868	5.02	1.09	4.67	1388.72
4-BrC6H4	1-naphth-SO2-	0.248	1.83	158.56	-0.868	5.02	1.09	4.67	1388.72
4-FC6H4	1-naphth-SO2-	0.248	1.7	124.38	-0.868	5.02	1.09	4.67	1388.72
4-CF3C6H4	1-naphth-SO2-	0.251	2.25	137	-0.868	5.02	1.09	4.67	1388.72
3-MeC6H4	1-naphth-SO2-	0.247	1.79	135.95	-0.868	5.02	1.09	4.67	1388.72
3-OMeC6H4	1-naphth-SO2-	0.248	1.78	142.17	-0.868	5.02	1.09	4.67	1388.72
3-BrC6H4	1-naphth-SO2-	0.25	1.75	144.44	-0.868	5.02	1.09	4.67	1388.72
4-FC6H4	1-naphth-SO2-	0.25	1.7	122.44	-0.868	5.02	1.09	4.67	1388.72
4-CF3C6H4	1-naphth-SO2-	0.251	1.94	135.14	-0.868	5.02	1.09	4.67	1388.72
2-MeC6H4	1-naphth-SO2-	0.247	1.78	133.98	-0.868	5.02	1.09	4.67	1388.72
Ph	4-MeC6H4-SO2-	0.248	1.7	121.46	-0.867	4.93	1.09	4.67	1388.72
Ph	4-OMeC6H4-SO2-	0.248	1.7	121.46	-0.866	4.93	1.09	4.67	1388.72
Ph	4-NO2C6H4-SO2-	0.248	1.7	121.46	-0.87	4.94	1.09	4.67	1388.72
Ph	4-ClC6H4-SO2-	0.248	1.7	121.46	-0.868	4.93	1.09	4.67	1388.72
Ph	3,5-MeC6H3-SO2-	0.248	1.7	121.46	-0.866	5.66	1.09	4.67	1388.72
Ph	2,4,6-MeC6H2-SO2-	0.248	1.7	121.46	-0.87	6.05	1.09	4.67	1388.72
Ph	1-naphth-SO2-	0.248	1.7	121.46	-0.868	5.02	1.09	4.67	1388.72
Ph	urea derivative	0.248	1.7	121.46	-0.629	6.88	1.09	6.83	1382.9

## Sheet: predictions
Aromatic group thionium	N-substituent nucleophile	Temperature (oC)	Catalyst	measured ee	predicted ee	measured ΔΔG‡	predicted ΔΔG‡
Ph	1-naphth-SO2-	0	AdDIP	-84	-90	-1.32	-1.61
4-MeC6H4	1-naphth-SO2-	0	AdDIP	-82	-87	-1.26	-1.44
4-tBuC6H4	1-naphth-SO2-	0	AdDIP	-88	-76	-1.49	-1.09
4-SMeC6H4	1-naphth-SO2-	0	AdDIP	-72	-79	-0.98	-1.17
4-ClC6H4	1-naphth-SO2-	0	AdDIP	-88	-88	-1.49	-1.52
4-BrC6H4	1-naphth-SO2-	0	AdDIP	-84	-87	-1.32	-1.46
4-FC6H4	1-naphth-SO2-	0	AdDIP	-86	-90	-1.4	-1.6
4-CF3C6H4	1-naphth-SO2-	0	AdDIP	-84	-89	-1.32	-1.56
3-MeC6H4	1-naphth-SO2-	0	AdDIP	-90	-88	-1.6	-1.51
3-OMeC6H4	1-naphth-SO2-	0	AdDIP	-74	-89	-1.03	-1.53
3-BrC6H4	1-naphth-SO2-	0	AdDIP	-82	-90	-1.26	-1.59
4-FC6H4	1-naphth-SO2-	0	AdDIP	-90	-91	-1.6	-1.68
4-CF3C6H4	1-naphth-SO2-	0	AdDIP	-90	-91	-1.6	-1.62
2-MeC6H4	1-naphth-SO2-	0	AdDIP	-80	-89	-1.19	-1.52
Ph	4-MeC6H4-SO2-	0	AdDIP	-76	-90	-1.08	-1.58
Ph	4-OMeC6H4-SO2-	0	AdDIP	-76	-90	-1.08	-1.57
Ph	4-NO2C6H4-SO2-	0	AdDIP	-56	-90	-0.69	-1.6
Ph	4-ClC6H4-SO2-	0	AdDIP	-74	-90	-1.03	-1.58
Ph	3,5-MeC6H3-SO2-	0	AdDIP	-76	-93	-1.08	-1.82
Ph	2,4,6-MeC6H2-SO2-	0	AdDIP	-62	-95	-0.79	-1.98
Ph	1-naphth-SO2-	0	AdDIP	-84	-90	-1.32	-1.61
Ph	urea derivative	-30	TCYP	-70	-50	-0.84	-0.54

## Sheet: model comparison
Aromatic group thionium	N-substituent nucleophile	Temperature (oC)	Catalyst	predicted ΔΔG‡	predicted ΔΔG‡ with less training data	difference in predictions
Ph	1-naphth-SO2-	0	AdDIP	-1.61	-1.59857	0.0114266
4-MeC6H4	1-naphth-SO2-	0	AdDIP	-1.44	-1.45851	0.0185087
4-tBuC6H4	1-naphth-SO2-	0	AdDIP	-1.09	-1.25144	0.161444
4-SMeC6H4	1-naphth-SO2-	0	AdDIP	-1.17	-1.17826	0.00826433
4-ClC6H4	1-naphth-SO2-	0	AdDIP	-1.52	-1.51275	0.0072461
4-BrC6H4	1-naphth-SO2-	0	AdDIP	-1.46	-1.4699	0.00990251
4-FC6H4	1-naphth-SO2-	0	AdDIP	-1.6	-1.58881	0.0111908
4-CF3C6H4	1-naphth-SO2-	0	AdDIP	-1.56	-1.62491	0.0649135
3-MeC6H4	1-naphth-SO2-	0	AdDIP	-1.51	-1.51432	0.0043228
3-OMeC6H4	1-naphth-SO2-	0	AdDIP	-1.53	-1.52648	0.00351699
3-BrC6H4	1-naphth-SO2-	0	AdDIP	-1.59	-1.58517	0.00483414
4-FC6H4	1-naphth-SO2-	0	AdDIP	-1.68	-1.66051	0.0194942
4-CF3C6H4	1-naphth-SO2-	0	AdDIP	-1.62	-1.64213	0.0221294
2-MeC6H4	1-naphth-SO2-	0	AdDIP	-1.52	-1.52127	0.00126504
Ph	4-MeC6H4-SO2-	0	AdDIP	-1.58	-1.55876	0.0212376
Ph	4-OMeC6H4-SO2-	0	AdDIP	-1.57	-1.55383	0.0161686
Ph	4-NO2C6H4-SO2-	0	AdDIP	-1.6	-1.57743	0.0225688
Ph	4-ClC6H4-SO2-	0	AdDIP	-1.58	-1.56369	0.0163065
Ph	3,5-MeC6H3-SO2-	0	AdDIP	-1.82	-1.83675	0.0167461
Ph	2,4,6-MeC6H2-SO2-	0	AdDIP	-1.98	-2.00762	0.0276166
Ph	1-naphth-SO2-	0	AdDIP	-1.61	-1.59857	0.0114266
Ph	urea derivative	-30	TCYP	-0.54	-0.588679	0.0486792
					average difference in prediction between two statistcal models	0.024055
